# Supplementary material
Source: Springer Nature journal article supplement (https://www.springermedizin.de/resource/supplementary/12888_2011_830_MOESM1_ESM.pdf/9478890)
Supplement: MOESM1 [file 9478890]

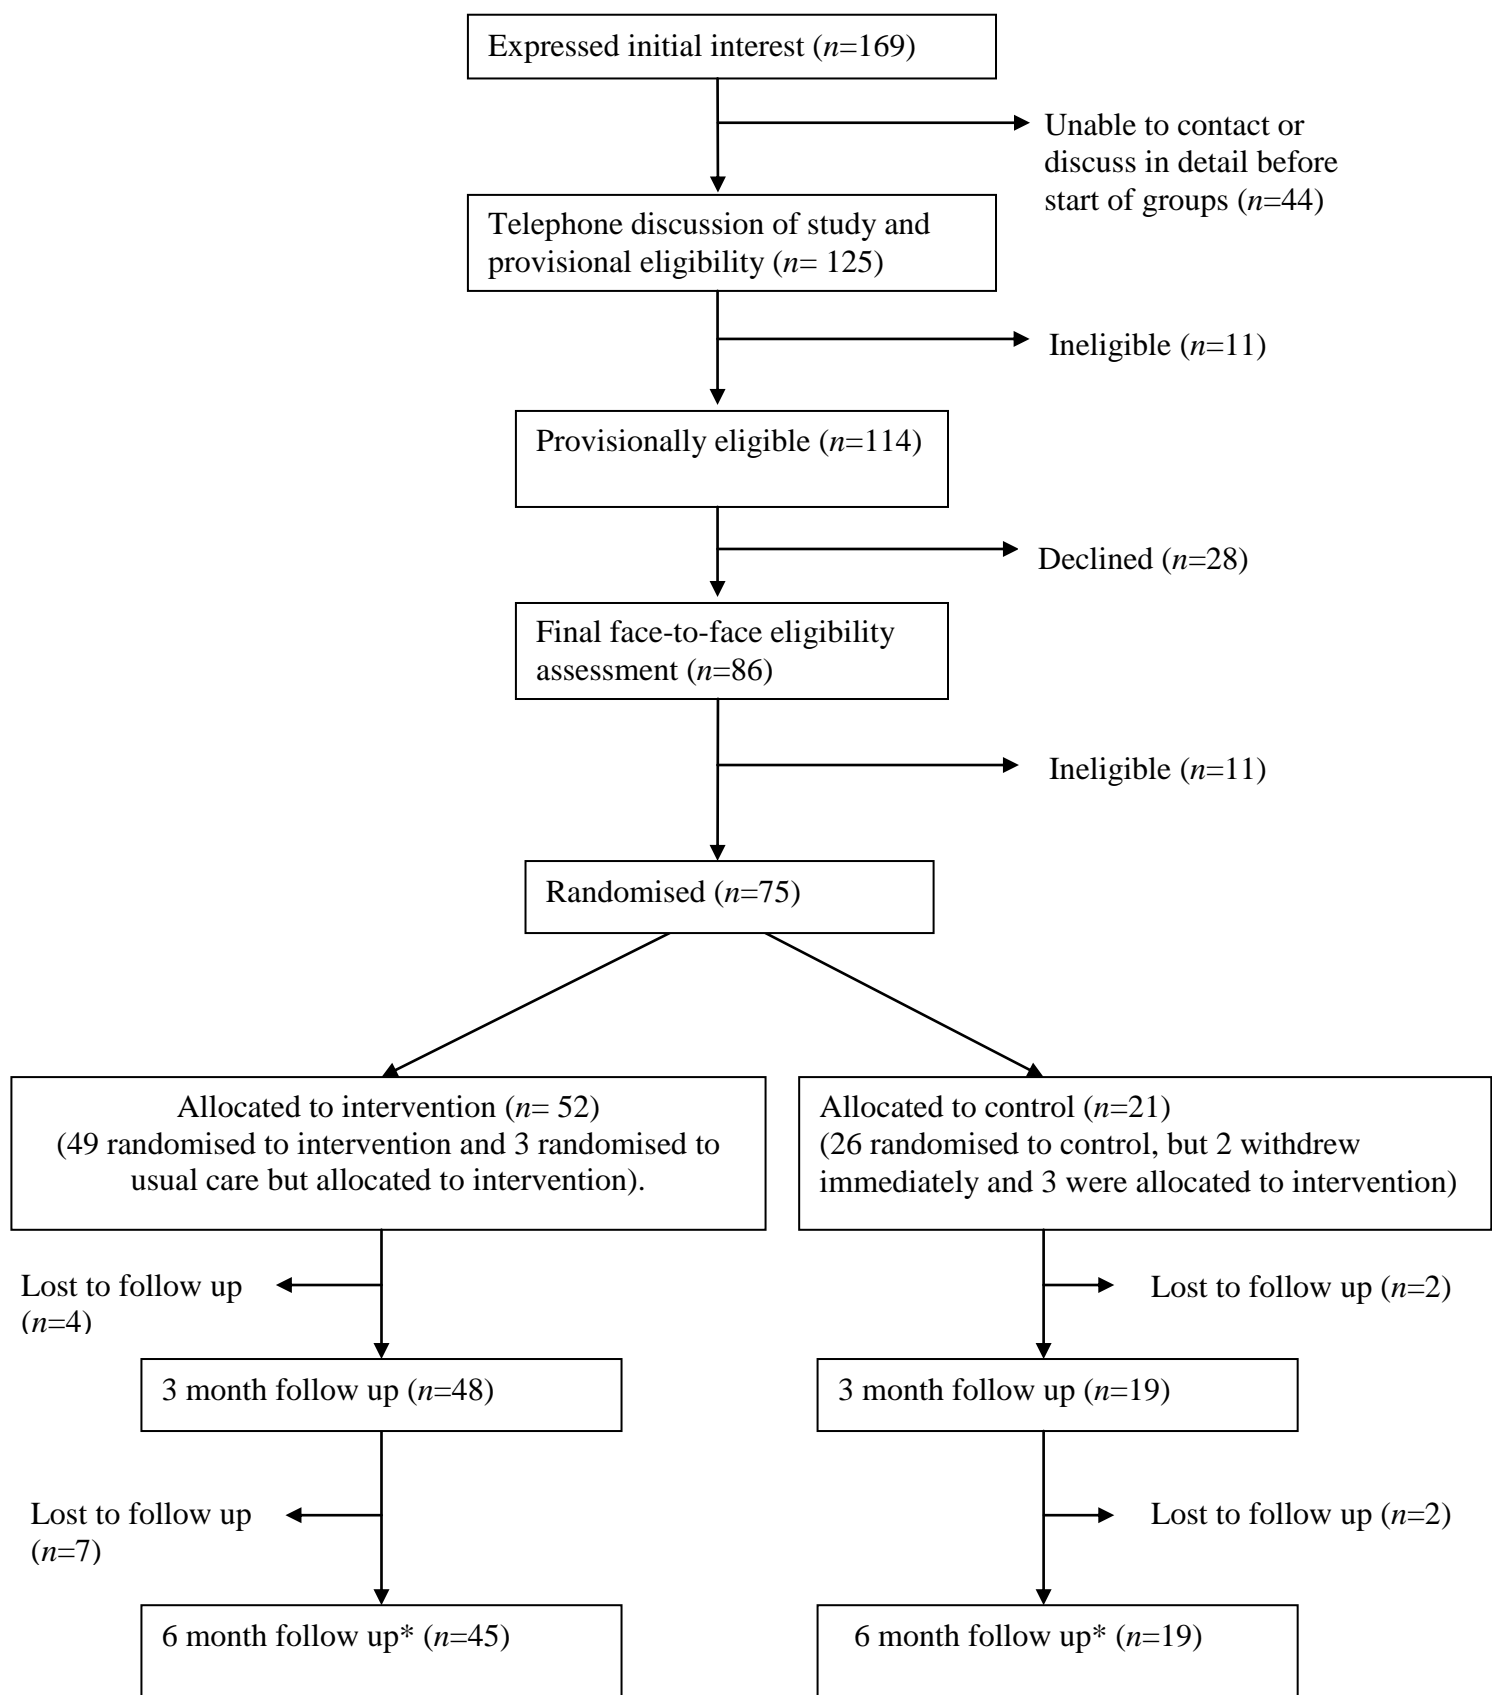

\*different individuals did not complete questionnaires at 3 and 6 months follow up so not an accumulative loss
